# Supplementary material
Source: Springer Nature journal article supplement (https://www.springermedizin.de/resource/supplementary/12936_2010_1250_MOESM3_ESM.pdf/9549326)

*P. falciparum* seroprevalence

A)

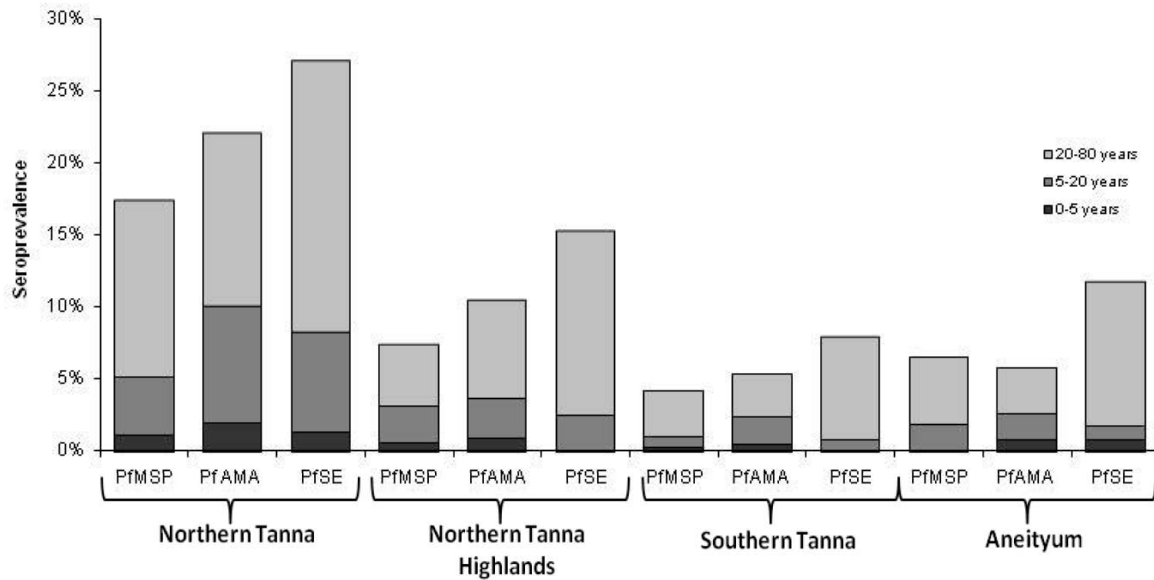

*P. vivax* seroprevalence

B)

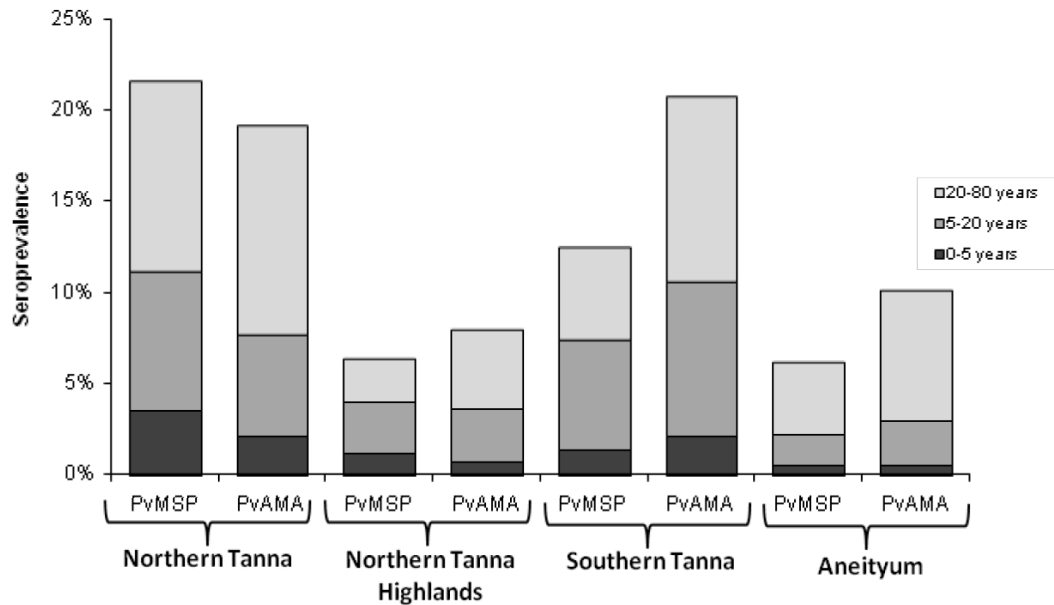

Supplement: MOESM3 [file 9549326]
